# Supplementary material
Source: PubMed Central journal article supplement (PMC3074947)

### Supplementary Figure 1

Western blot verifying the measurement of Perilipin 3 in skeletal muscle (Perilipin 3 was formerly known as tail-interacting protein of 47 kDa; TIP47). Incubation of HeLa cells with oleate induces a marked increase in Perilipin 3 expression. Lane 1: Negative control (HeLa lipid droplet fraction without oleate), Lane 2: Positive control (HeLa lipid droplet fraction with oleate), and Lanes 3-8: Human skeletal muscle samples (30 $\mu$ g protein loaded per lane)

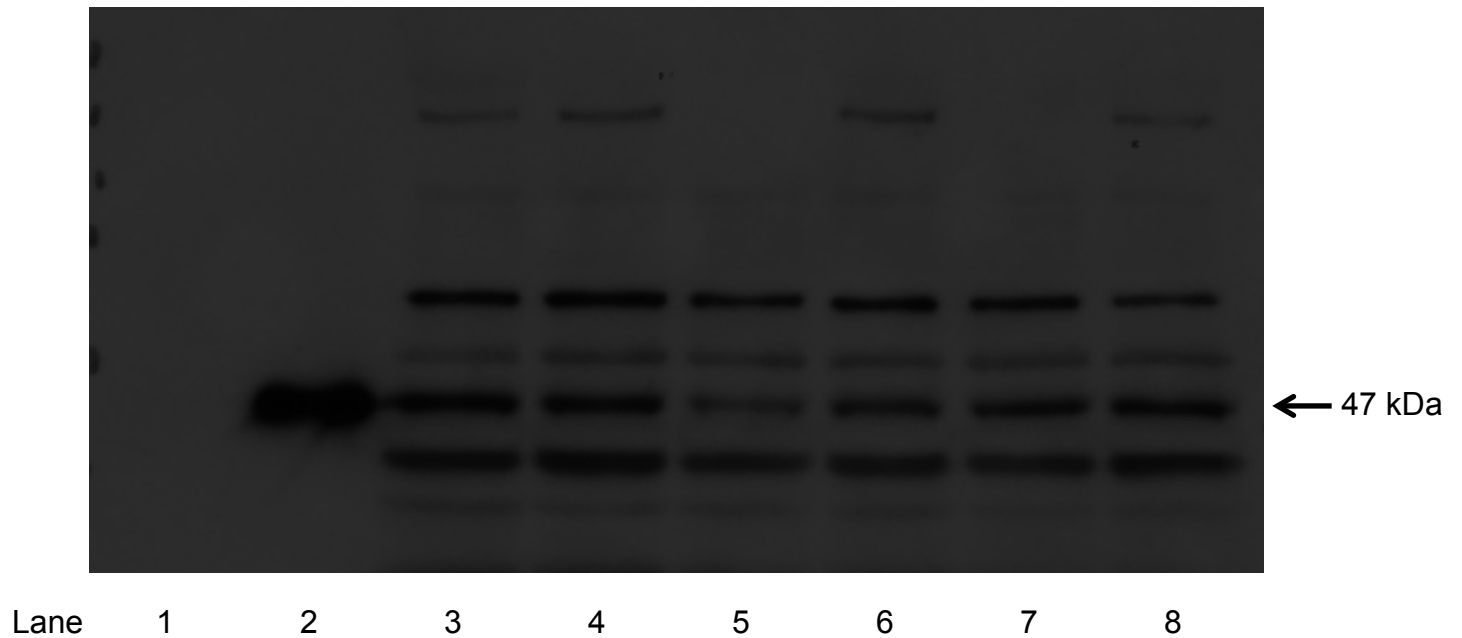

Supplement: supp_00316.2010_figS1.pdf [file supp_00316.2010_figS1.pdf]
